# Supplementary material
Source: PubMed Central journal article supplement (PMC4716686)

The American Journal of Human Genetics

Supplemental Data

# **Limited Clinical Utility of Non-invasive Prenatal Testing for Subchromosomal Abnormalities**

**Kitty K. Lo, Evangelia Karampetsou, Christopher Boustred, Fiona McKay, Sarah Mason,  
Melissa Hill, Vincent Plagnol, and Lyn S. Chitty**

## Figure S1

Normalized counts ratio for samples sequenced at 12-plex with CNVs that were detected by our analysis pipeline.

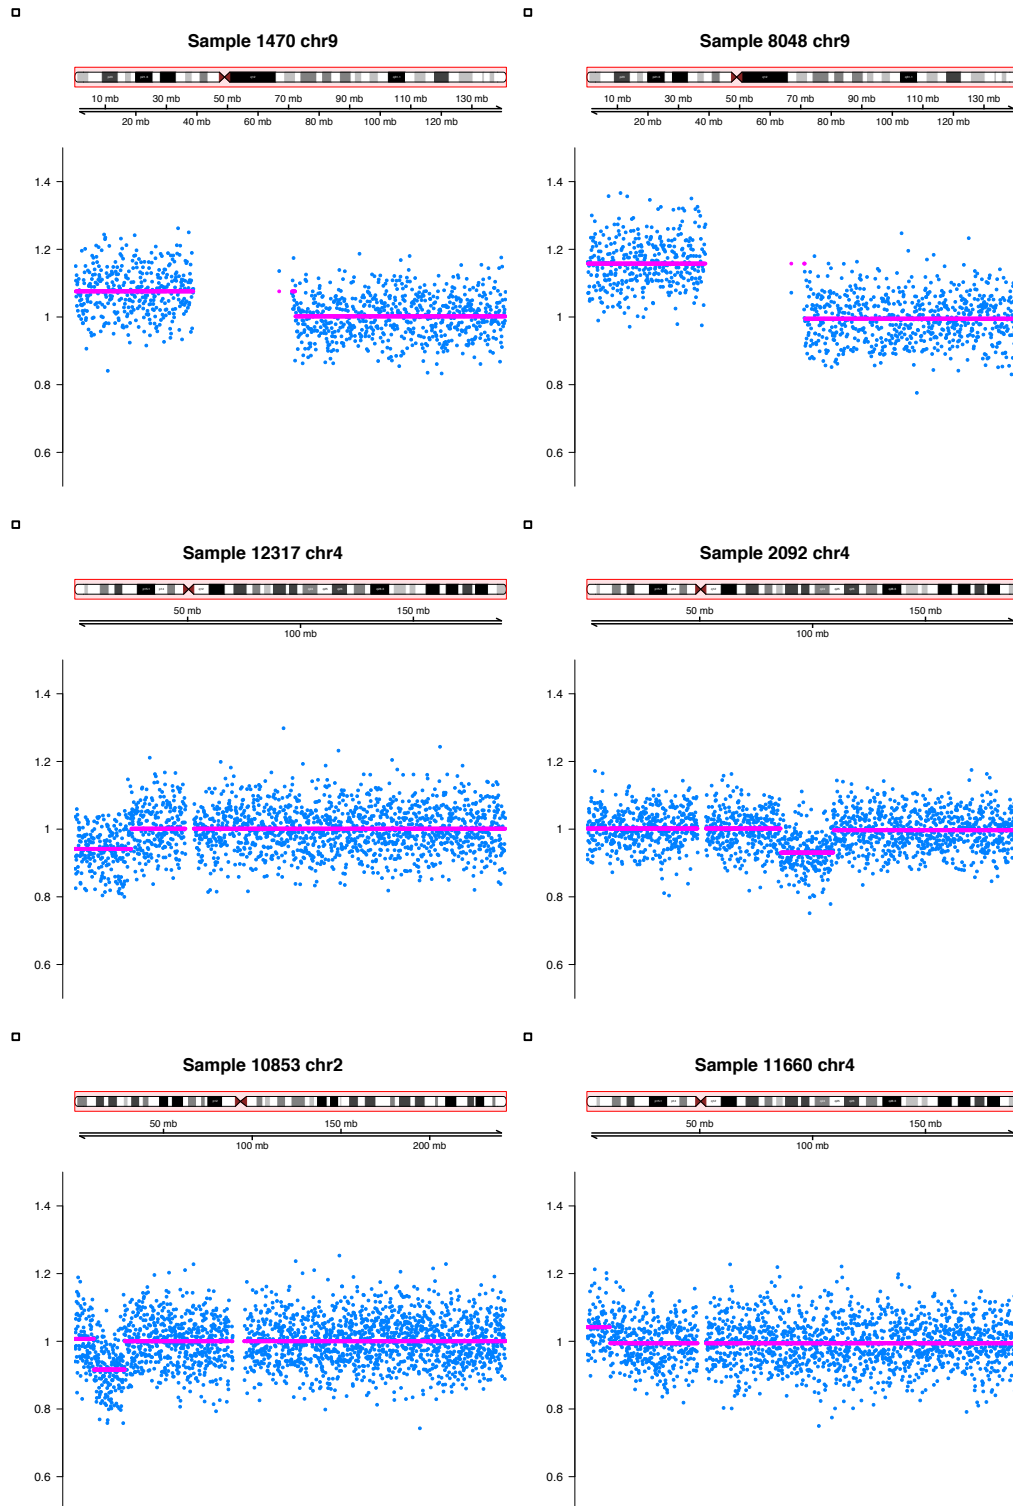

□

Sample 21 chr5

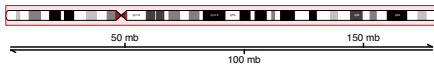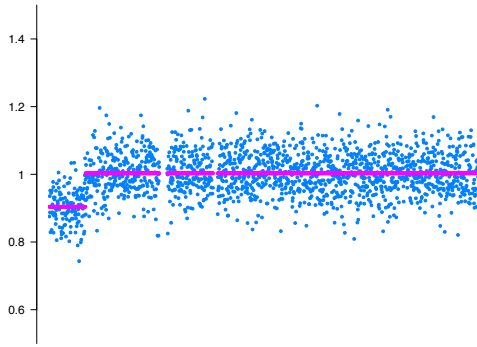

□

Sample 12279 chr18

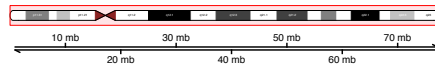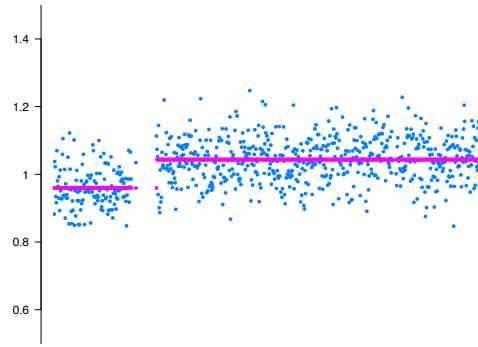

□

Sample R-01025 chr9

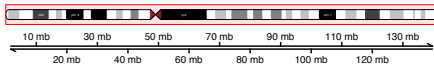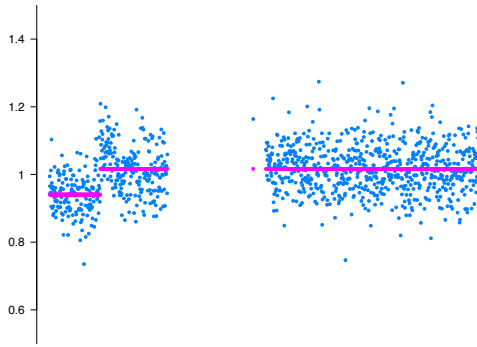

□

Sample 1144 chr12

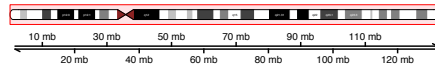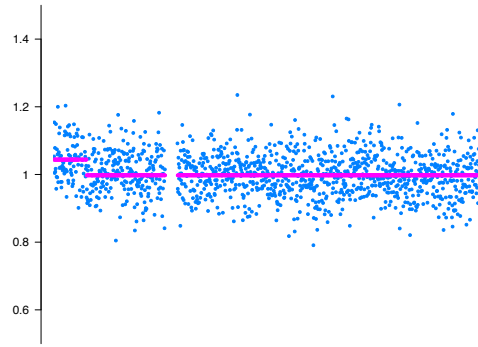

□

Sample 1144 chr18

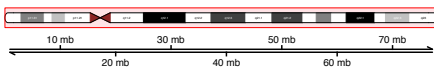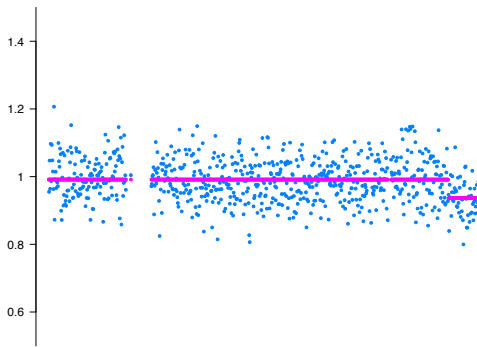

□

Sample R-00940 chr7

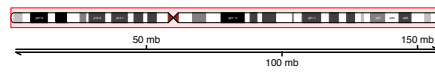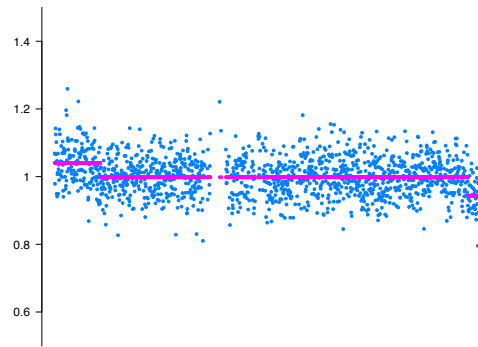

□

Sample 9639 chr6

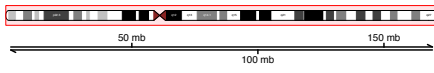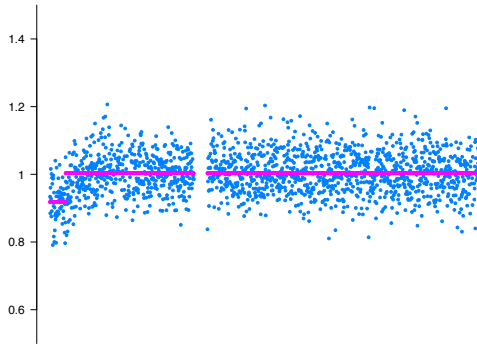

□

Sample R-01716 chr6

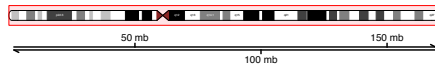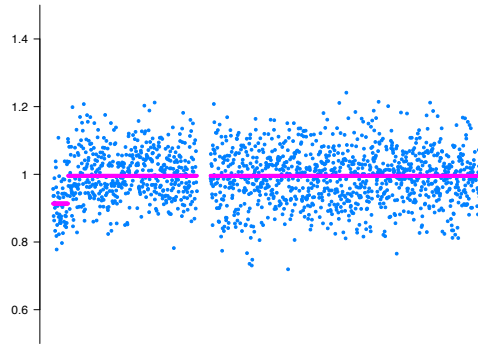

□

Sample R-00875 chr5

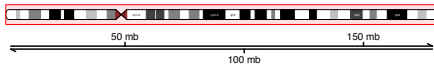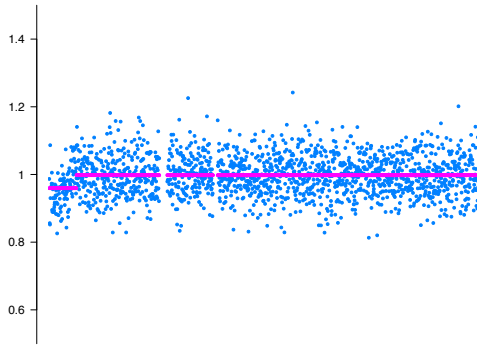

□

Sample 11590 chr17

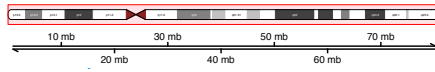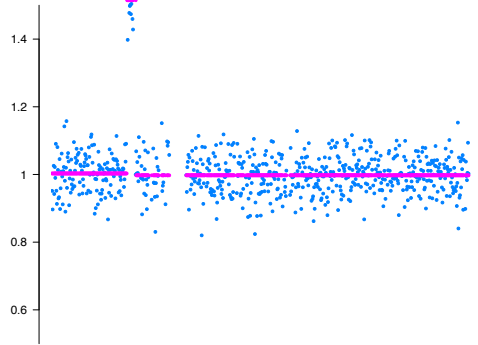

□

Sample 612 chr17

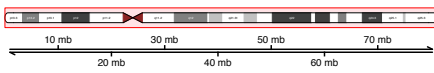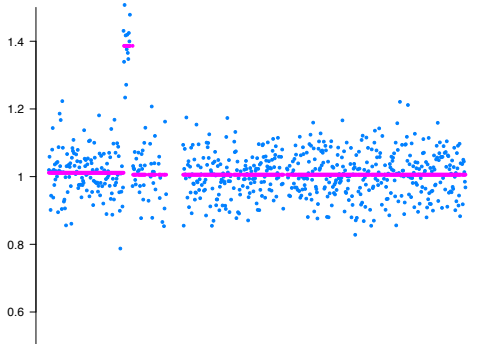

□

Sample 6876 chr22

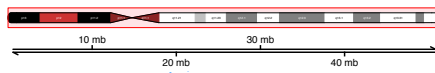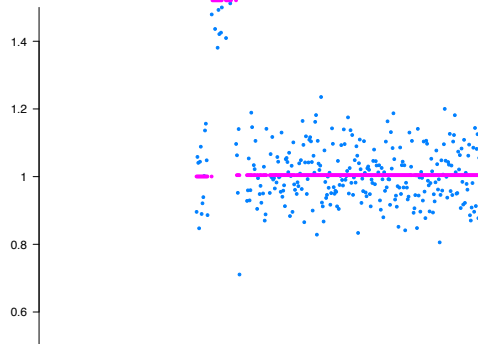

# Figure S2

Normalized counts ratios for samples that were detected after deeper sequencing

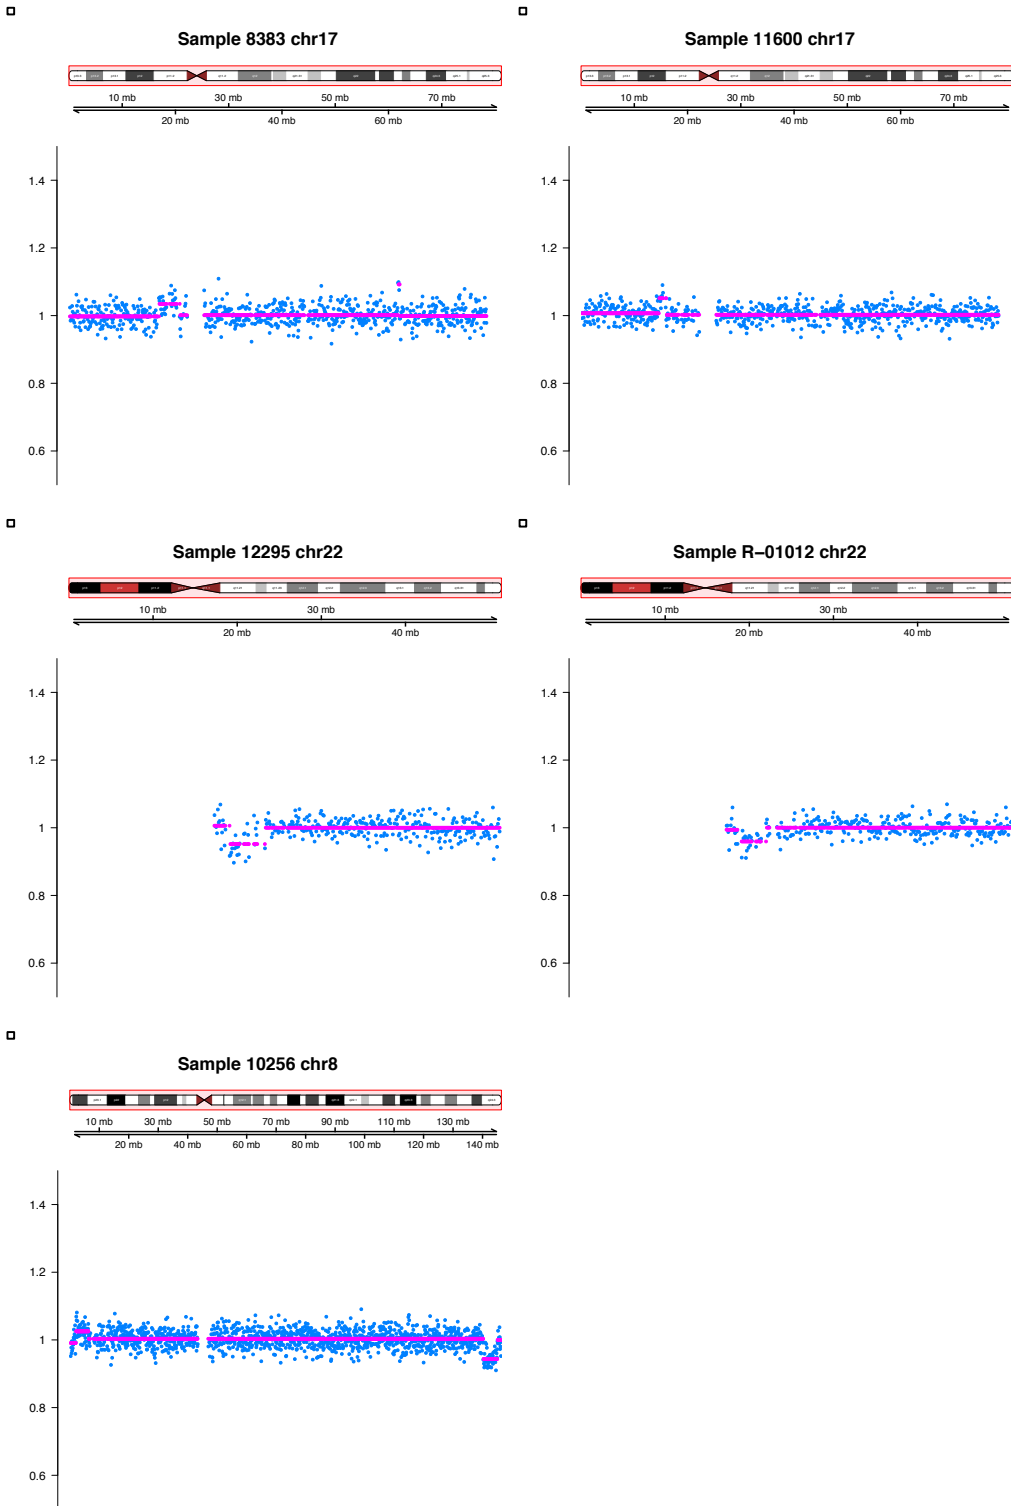

□

Sample 5216 chr13

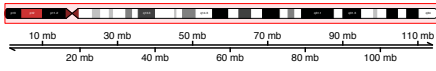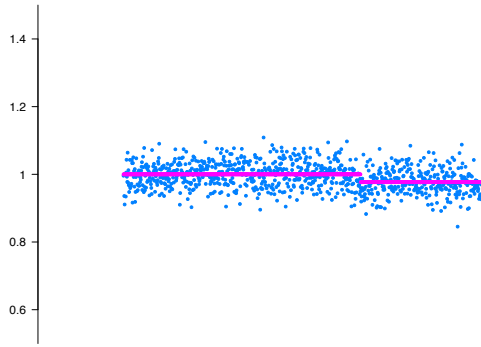

□

Sample R-01071 chr4

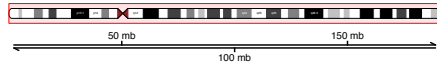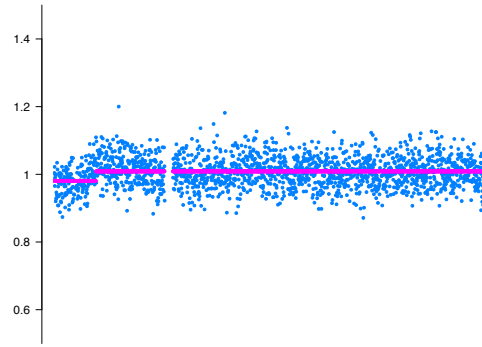

Supplement: mmc1.pdf [file mmc1.pdf]
